# Supplementary material for: A Prospective Study of Outcomes After Tubularized Incised Plate (TIP) Urethroplasty: a Multivariable Analysis of Prognostic Factors in Children
Source: bioRxiv or medRxiv preprint supplement (doi:10.1101/2020.09.15.20193037), 2020-10-10
Supplement: Supplementary file [file 2020.09.15.20193037-1.pdf]

Patient Name : .....

Date:.....

MRN: .....

Age:.....

Relevant personal detail (Phone No/ Address):.....

**Anatomic characteristics:**

- site of the urethral meatus (before chordee correction): Glanular    Distal     Midshaft
- Dorsal Penile Length .....// Ventral Penile Length.....// Length of hypoplasia .....
- Ventral curvature:  Yes     No
- Foreskin:  Hooded(incomplete)    Complete
- Gonads:  Normal    UDT palpable    UDT Non palpable     Abnormal palpation
- Scrotum: Normal    Hypoplastic    Transposition     Incomplete fusion -other Anomalies(micropenis&etc.)

**1. Site of urethral meatus (before chordee correction)**  
 Glanular Hypospadias   Distal Penile Hypospadias   Proximal Hypospadias 

**2. Site of urethral meatus (after chordee correction)**  
 Glanular Hypospadias   Distal Penile Hypospadias   Proximal Hypospadias 

**3. Prepuce**  
 Complete   Incomplete 

**4. Glans**  
 cleft   Incomplete cleft   Flat 

**5. Chordee**  
 No chordee   Superficial chordee   Deep chordee 

**6. Urethral plate width**  
 <1cm   ≥1cm 

**7. Penile torsion**  
 No torsion   Present 

**8. Scrotal transposition**  
 No transposition   Present 

**Surgical specifications:**

- Urethral Plate Width:  In the Flaccid Penis     In the Erected Penis
- Urethral Plate Length:  In the Flaccid Penis     In the Erected Penis
- Site of the meatus (after chordee correction):  Distal     Midshaft     Proximal
- Length of the reconstructed urethra: .....

**Early acute postoperative complications: (POD:.....)**

- Bleeding and hematoma
- Edema

- Wound infection
- Wound dehiscence
- Skin necrosis
- Flap necrosis
- Fistula
- Penile torsion
  
- Inadvertent removal of urethral stent
- Bladder spasms

**Outcome at Follow-up Visits(1<sup>st</sup> and 6<sup>th</sup> months) : (Date:.....)**

●Patients's (parents') satisfaction:  Satisfied  Not satisfied (comments.....)

●Crying/ Pain(Dysuria equivalents) during micturations:  Yes  No

●Physician's evaluation:

-Cosmesis:  Satisfactory  Unsatisfactory (comments)

- Urinary tract infection:  Yes  No

-Complications :  No

Yes,including:

Insufficient cosmetic result

Glans dehiscence

Meatal stenosis

Urethral dehiscence

Fistula

Stenosis

Non-retractable foreskin

Persistent chordee

Urethral prolapse

Penile twist

Others.....

- Further surgery

No

Yes; \*Type:.....\* When: .....

Collector's Name& signature:
